# Supplementary material for: Detection and Identification of Old World Leishmania by High Resolution Melt Analysis
Source: PubMed Central journal article supplement (PMC2797090; doi:10.1371/journal.pntd.0000581), 2010-01-12
Supplement: pntd.0000581.s001.pdf [file pntd.0000581.s001.pdf]

1) *L. infantum* AGCTGGATCATTTTCCGATGATTACACCCAAAAAACAATATACAA--CT 50  
2) *L. infantum* AGCTGGATCATTTTCCGATGATTACACCCAAAAAACAATATACAA--CT 50  
3) *L. donovani* AGCTGGATCATTTTCCGATGATTACACCCAAAAAACAATATACAA--CT 50  
4) *L. donovani* AGCTGGATCATTTTCCGATGATTACACCCAAAAAACAATATACAC--CT 50  
5) *L. major* AGCTGGATCATTTTCCGATGATTACACCCAAAAAACAATATACAA--CT 50  
6) *L. major* AGCTGGATCATTTTCCGATGATTACACCCAAAAAACAATATACAA--CT 50  
7) *L. tropica* AGCTGGATCATTTTCCGATGATTACACCCAAAAAACAATATACAAACT 50  
8) *L. tropica* AGCTGGATCATTTTCCGATGATTACACCCAAAAAACAATATACAAACT 50  
9) *L. aethiopica* AGCTGGATCATTTTCCGATGATTACACCCAAAAAACAATATACAAACT 50  
\*\*\*\*\* \*\*

1) MHOM/TN/1980/IPT1 CGGGGAAGACC-TAT---GTATATATATAGTGTAGGCCTTTCCACATA 100  
2) MHOM/ES/1993/PM1 CGGGGAAGACC-TAT---GTATATATATAGTGTAGGCCTTTCCACATA 100  
3) MHOM/IN/1980/DD8 CGGGGAAGACC-TAT---GTATATATATAGTGTAGGCCTTTCCACATA 100  
4) MHOM/ET/1967/HU3(LV9) CGGGGAGGACC-TAT---GTATATATATAGTGTAGGCCTTTCCACATA 100  
5) MHOM/TM/1973/5ASKH CGGGGAAGGCT-TATTCTATATATATATAGTATAGGCCTTTCCACATA 100  
6) MHOM/SN/1996/DPPE23 CGGGGAAGGCT-TATTCTATATATATATAGTATAGGCCTTTCCACATA 100  
7) ISER/IL/2002/LRC-L909 CGGGGAGGCTATATATTATACATTATATATAGGCCTTT-CCCACCT 100  
8) ISER/IL/1998/LRC-L758 CGGGGAGGCTATATATTATACATTATATATAGGCCTTT-CCCACAT 100  
9) MHOM/ET/1972/L102 CGGGGAGGCTATATATTATATATATAGGCCTTTCCACATAC 100  
\*\*\*\*\* \*\* \*\* \*\* \*\* \*\* \*\* \*\* \*\* \*\* \*\* \* \* \* \* \*

1) MHOM/TN/1980/IPT1 -CACAGCAAAGTTTTGTACTCAAAATTTGCAGTAAAAAAGGCCGATC 150  
2) MHOM/ES/1993/PM1 -CACAGCAAAGTTTTGTACTCAAAATTTGCAGTAAAAAAGGCCGATC 150  
3) MHOM/IN/1980/DD8 -CACAGCAAAGTTTTGTACTCAAAATTTGCAGTAAAAAAGGCCGATC 150  
4) MHOM/ET/1967/HU3(LV9) -CACAGCAAAGTTTTGTACTCAAAATTTGCAGTAAAAAAGGCCGATC 150  
5) MHOM/TM/1973/5ASKH -CACAGCAAATTTTTTACTCAAAATTTGCAGTAAAAAAG--GCCGATC 150  
6) MHOM/SN/1996/DPPE23 -CACAGCAAATTTTTTACTCAAAATTTGCAGTAAAAAAG--GCCGATC 150  
7) ISER/IL/2002/LRC-L909 -CCCCGGCAAATTTTTACTCAAGTTTGGCAGTAAACAAAAGGCCGATC 150  
8) ISER/IL/1998/LRC-L758 ACACAGCAAATTTTTTACTCAAGTTTGCAGTAAACAAAAGGCCGATC 150  
9) MHOM/ET/1972/L102 ACACAGCAAATTTTTTACTCAAGTTTGCAGTAAAGAAAAGGCCGATC 150  
\*\*\* \*\* \* \* \* \* \* \* \* \* \* \* \* \* \* \* \*

1) MHOM/TN/1980/IPT1 GACGTTATAAC--GCACCGCC-----TATACA--AAAGCAAAAATGTCC 200  
2) MHOM/ES/1993/PM1 GACGTTATAAC--GCACCGCC-----TATACA--AAAGCAAAAATGTCC 200  
3) MHOM/IN/1980/DD8 GACGTTATAAC--GCACCGCC-----TATACA--AAAGCAAAAATGTCC 200  
4) MHOM/ET/1967/HU3(LV9) GACGTTATAAC--GCACCGCC-----TATACA--AAAGCAAAAATGTCC 200  
5) MHOM/TM/1973/5ASKH GACGTTGTAGAACGCACCGCC-----TATACACAAAAGCAAAAATGTCC 200  
6) MHOM/SN/1996/DPPE23 GACGTTGTAGAACGCACCGCC-----TATACACAAAAGCAAAAATGTCC 200  
7) ISER/IL/2002/LRC-L909 GACGTTTACC--CACCGCC TATCCCCAAAAGCAAAAATGTCC 200  
8) ISER/IL/1998/LRC-L758 GACGTTATAACG--CACCGCC TATACACAAAAGCAAAAATGTCC 200  
9) MHOM/ET/1972/L102 GACGTTATAACGCAACCGCCGCCTATATACACAAAAGCAAAAATGTCC 200  
\*\*\*\*\* \*\* \* \* \* \* \*

1) MHOM/TN/1980/IPT1 GTTTATACAAAAA-TATACGCGGTTTCGGTTTTTGCGGG----- 250  
2) MHOM/ES/1993/PM1 GTTTATACAAAAA-TATACGCGGTTTCGGTTTTTGCGGG----- 250  
3) MHOM/IN/1980/DD8 GTTTATACAAAAA-TATACGCGGTTTCGGTTTTTGCGGG----- 250  
4) MHOM/ET/1967/HU3(LV9) GTTTATACAAAAA-TATACGCGGTTTCGGTTTTTGCGGG----- 250  
5) MHOM/TM/1973/5ASKH GTTTATACAAAAAATAGACGCGGTTTCGGTTTTTGCGGGAGGGAGAGA 250  
6) MHOM/SN/1996/DPPE23 GTTTATACAAAAAATAGACGCGGTTTCGGTTTTTGCGGGAGGGAGAGA 250  
7) ISER/IL/2002/LRC-L909 GTTTATCAAAATTTA---CCGGCTTTCCGGTTTTGTTGGCGGG----- 250  
8) ISER/IL/1998/LRC-L758 GTTTATCAAAATATA---CGGCGTTTTC-GGTTTTGTTGG----- 250  
9) MHOM/ET/1972/L102 GTTTATCAAAATATA---CGGCGTTTTCGGTTTTTTGTTGGCGGGGG----- 250  
\*\*\*\*\* \*\* \* \* \* \* \*

1) MHOM/TN/1980/IPT1 ---GTGGGTGCGTGTG---TGGATAACGGCTCACATAACGTGTGCGCAT 298  
2) MHOM/ES/1993/PM1 ---GTGGGTGCGTGTG---TGGATAACGGCTCACATAACGTGTGCGCAT 298  
3) MHOM/IN/1980/DD8 ---GTGGGTGCGTGTG---TGGATAACGGCTCACATAACGTGTGCGCAT 298  
4) MHOM/ET/1967/HU3(LV9) ---GTGGGTGCGTGTG---TGGATAACGGCTCACATAACGTGTGCGCAT 298  
5) MHOM/TM/1973/5ASKH GAGGGGGGTGCGTGTGCGTGGATAACGGCTCACATAACGTGTGCGCAT 298  
6) MHOM/SN/1996/DPPE23 GAGGGGGGTGCGTGTGCGTGGATAACGGCTCACATAACGTGTGCGCAT 298  
7) ISER/IL/2002/LRC-L909 GGGGGGGTTCCTTTGTGTGGATAACGGCTCACATAACGTGTGCGCAT 298  
8) ISER/IL/1998/LRC-L758 CGGGGGGTGCGTGTGCGTGGATAACGGCTCACATAACGTGTGCGCAT 298  
9) MHOM/ET/1972/L102 ---GGGGGTGCGTGTGCGTGGATAACGGCTCACATAACGTGTGCGCAT 298  
\* \* \* \* \* \* \* \* \* \* \* \* \* \* \* \* \* \* \* \* \* \* \* \* \* \* \*
